# Supplementary material for: The New Insight into the Effects of Different Fixing Technology on Flavor and Bioactivities of Orange Dark Tea
Source: MDPI journal article supplement (doi:10.3390/molecules28031079), 2023-01-20
Supplement: s1 [file s1]

## Supplementary Materials:

**Table S1.** Moisture content of tea and peels after different fixing methods (%).

| Moisture | Tea             | Peel            |
|----------|-----------------|-----------------|
| HA       | $4.79 \pm 0.01$ | $4.58 \pm 0.25$ |
| ST       | $4.60 \pm 0.01$ | $4.20 \pm 0.08$ |
| SL       | $4.29 \pm 0.01$ | $5.36 \pm 0.31$ |
